# Supplementary material
Source: Springer Nature journal article supplement (https://www.springermedizin.de/resource/supplementary/12889_2011_3667_MOESM2_ESM.pdf/9490418)
Supplement: MOESM2 [file 9490418]

**Supplemental Table 2: Pathogen prevalence, by socio-demographic, sexual behaviour and sex-work related characteristics, clients of female sex workers, Karnataka, South India<sup>a</sup>**

|                                              |               | HIV         | HSV-2       | Syphilis    | CT/NG       |
|----------------------------------------------|---------------|-------------|-------------|-------------|-------------|
|                                              |               | % (N=2,745) | % (N=2,610) | % (N=2,613) | % (N=2,736) |
| Prevalence                                   |               | 5.6         | 28.4        | 3.6         | 2.2         |
|                                              |               | <b>p</b>    | <b>p</b>    | <b>p</b>    | <b>p</b>    |
| Age                                          |               | .002        | <.0001      | .044        | .069        |
|                                              | 18-24         | 2.7         | 11.6        | 1.9         | 2.2         |
|                                              | 25-29         | 5.6         | 22.3        | 3.3         | 3.7         |
|                                              | 30-39         | 7.8         | 38.9        | 4.7         | 1.5         |
|                                              | 40+           | 7.2         | 48.7        | 4.9         | 1.3         |
| <i>Mean</i>                                  |               | 32.7        | 34.6        | 33.4        | 28.2        |
| Marital status                               |               | <.0001      | <.0001      | .033        | .505        |
|                                              | Married       | 5.7         | 35.3        | 4.0         | 2.2         |
|                                              | Separated     | 25.5        | 65.1        | 8.5         | 0.0         |
|                                              | Never married | 4.2         | 13.7        | 2.4         | 2.5         |
| Occupation                                   |               | .007        | .267        | .202        | .591        |
|                                              | Transport     | 3.3         | 25.0        | 1.9         | 2.8         |
|                                              | Service       | 8.6         | 30.6        | 4.7         | 1.9         |
|                                              | Business      | 5.7         | 31.8        | 3.4         | 2.7         |
|                                              | Other         | 6.0         | 28.6        | 4.2         | 1.9         |
| Can read and write                           |               | <.0001      | <.0001      | .0006       | .019        |
|                                              | No            | 9.6         | 36.7        | 6.2         | 1.0         |
|                                              | Yes           | 4.3         | 25.5        | 2.7         | 2.6         |
| Districts                                    |               | <.0001      | .055        | .122        | .005        |
|                                              | Belgaum       | 6.1         | 27.7        | 4.3         | 1.4         |
|                                              | Bagalkot      | 13.5        | 36.3        | 1.9         | 0.5         |
|                                              | Bellary       | 6.1         | 26.5        | 5.5         | 2.4         |
|                                              | Shimoga       | 2.6         | 24.9        | 2.3         | 1.2         |
|                                              | Bangalore     | 2.4         | 26.5        | 3.9         | 3.6         |
|                                              | Mysore        | 5.4         | 31.3        | 2.9         | 5.0         |
| Age at 1 <sup>st</sup> sex                   |               | .027        | .488        | .492        | .079        |
|                                              | <18           | 4.0         | 29.4        | 2.7         | 3.2         |
|                                              | 18-20         | 6.9         | 28.3        | 3.5         | 2.6         |
|                                              | 21-24         | 3.7         | 26.1        | 3.6         | 1.3         |
|                                              | 25+           | 5.5         | 31.5        | 5.2         | 0.9         |
|                                              | <i>Mean</i>   | 20.0        | 20.1        | 20.5        | 19.1        |
| Have an intimate partner                     |               | .186        | <.0001      | .251        | .254        |
|                                              | No            | 4.7         | 18.2        | 2.9         | 2.7         |
|                                              | Yes           | 6.1         | 33.5        | 3.9         | 2.0         |
| Condom use in last sex with intimate partner |               | .619        | .041        | .939        | .008        |
|                                              | No            | 6.0         | 34.5        | 4.0         | 1.6         |
|                                              | Yes           | 7.2         | 25.2        | 3.8         | 4.9         |

|                                      |      |      |      |        |      |      |      |      |
|--------------------------------------|------|------|------|--------|------|------|------|------|
| Use condoms with intimate partner    |      | .627 |      | .072   |      | .968 |      | .229 |
| Sometimes use                        | 6.9  |      | 28.0 |        | 3.9  |      | 3.1  |      |
| Never use                            | 5.9  |      | 34.3 |        | 3.9  |      | 1.8  |      |
| Anal sex with intimate partners      |      | .057 |      | .860   |      | .562 |      | .941 |
| No                                   | 5.8  |      | 31.7 |        | 3.9  |      | 1.9  |      |
| Yes                                  | 1.1  |      | 33.7 |        | 2.5  |      | 1.7  |      |
| Anal sex with MSM/hijra (6 months)   |      | .338 |      | .186   |      | .765 |      | .012 |
| No                                   | 5.7  |      | 27.8 |        | 3.5  |      | 2.0  |      |
| Yes                                  | 4.1  |      | 36.8 |        | 4.0  |      | 6.2  |      |
| Age at 1 <sup>st</sup> paid sex      |      | .055 |      | .307   |      | .421 |      | .398 |
| <18                                  | 2.7  |      | 27.8 |        | 2.1  |      | 3.7  |      |
| 18-20                                | 6.6  |      | 27.0 |        | 3.2  |      | 2.4  |      |
| 21-24                                | 3.9  |      | 28.0 |        | 3.7  |      | 2.1  |      |
| 25+                                  | 6.9  |      | 32.4 |        | 4.9  |      | 1.5  |      |
| Mean                                 | 21.8 |      | 22.0 |        | 22.3 |      | 20.5 |      |
| Duration of paid sex                 |      | .001 |      | <.0001 |      | .347 |      | .503 |
| 1 year or less                       | 2.1  |      | 10.5 |        | 1.8  |      | 1.9  |      |
| 2-4                                  | 4.5  |      | 18.3 |        | 3.2  |      | 2.8  |      |
| 5-9                                  | 6.1  |      | 25.1 |        | 4.2  |      | 2.6  |      |
| 10+                                  | 7.5  |      | 43.8 |        | 4.2  |      | 1.8  |      |
| Mean                                 | 10.8 |      | 12.6 |        | 11.1 |      | 7.7  |      |
| Place of solicitation                |      | .003 |      | .142   |      | .179 |      | .026 |
| Public places                        | 4.6  |      | 27.1 |        | 3.8  |      | 1.7  |      |
| Brothel                              | 9.4  |      | 31.1 |        | 6.0  |      | 2.8  |      |
| Home                                 | 6.3  |      | 29.8 |        | 3.1  |      | 1.9  |      |
| Lodge                                | 0.6  |      | 19.2 |        | 1.9  |      | 6.5  |      |
| Number of FSWs (6 months)            |      | .617 |      | .091   |      | .578 |      | .416 |
| 1                                    | 6.7  |      | 27.4 |        | 2.9  |      | 1.8  |      |
| 2-3                                  | 4.7  |      | 27.0 |        | 3.5  |      | 2.1  |      |
| 4-5                                  | 6.2  |      | 28.1 |        | 3.5  |      | 1.9  |      |
| 6-9                                  | 5.7  |      | 28.0 |        | 5.3  |      | 4.1  |      |
| 10+                                  | 6.6  |      | 38.7 |        | 3.0  |      | 2.1  |      |
| Mean                                 | 4.7  |      | 4.7  |        | 4.2  |      | 4.8  |      |
| Number of Occasional FSWs (6 months) |      | .165 |      | .068   |      | .484 |      | .331 |
| 0                                    | 8.1  |      | 33.5 |        | 3.4  |      | 2.3  |      |
| 1                                    | 4.3  |      | 23.9 |        | 2.0  |      | 1.6  |      |
| 2-4                                  | 5.1  |      | 27.0 |        | 3.7  |      | 1.9  |      |
| 5+                                   | 6.1  |      | 30.8 |        | 4.2  |      | 3.3  |      |
| Mean                                 | 3.7  |      | 3.7  |        | 3.4  |      | 4.0  |      |

|                                           |               |            |      |            |       |            |        |            |      |
|-------------------------------------------|---------------|------------|------|------------|-------|------------|--------|------------|------|
| Number of Regular FSWs<br>(6 months)      |               |            | .011 |            | .054  |            | .887   |            | .911 |
|                                           | 0             | 4.6        |      | 26.4       |       | 3.5        |        | 2.2        |      |
|                                           | 1             | 8.0        |      | 30.1       |       | 3.8        |        | 2.1        |      |
|                                           | 2-4           | 5.8        |      | 30.8       |       | 2.9        |        | 2.7        |      |
|                                           | 5+            | 3.8        |      | 37.6       |       | 4.0        |        | 1.9        |      |
|                                           | <i>Mean</i>   | <i>1.0</i> |      | <i>1.0</i> |       | <i>0.8</i> |        | <i>0.8</i> |      |
| Condom use in last sex,<br>occasional FSW |               |            | .579 |            | .017  |            | .751   |            | .173 |
|                                           | No            | 4.9        |      | 31.1       |       | 3.4        |        | 1.4        |      |
|                                           | Yes           | 5.4        |      | 25.6       |       | 3.7        |        | 2.6        |      |
| Use condoms, occasional<br>FSW            |               |            | .478 |            | .003  |            | .624   |            | .537 |
|                                           | Sometimes use | 5.4        |      | 25.5       |       | 3.7        |        | 2.4        |      |
|                                           | Never use     | 4.7        |      | 32.8       |       | 2.3        |        | 1.8        |      |
| Condom use in last sex,<br>regular FSW    |               |            | .386 |            | .139  |            | .931   |            | .276 |
|                                           | No            | 6.3        |      | 34.2       |       | 3.8        |        | 1.6        |      |
|                                           | Yes           | 7.6        |      | 29.1       |       | 3.9        |        | 2.8        |      |
| Never use condoms, regular<br>FSW         |               |            | .348 |            | .039  |            | .797   |            | .673 |
|                                           | Sometimes use | 7.4        |      | 28.9       |       | 3.7        |        | 2.5        |      |
|                                           | Never use     | 6.5        |      | 35.8       |       | 4.1        |        | 2.0        |      |
| Ever asked for anal<br>intercourse, FSW   |               |            | .187 |            | .737  |            | .247   |            | .660 |
|                                           | No            | 5.9        |      | 28.1       |       | 3.7        |        | 2.2        |      |
|                                           | Yes           | 3.5        |      | 30.3       |       | 2.4        |        | 2.7        |      |
| Ever had anal sex, FSW                    |               |            | .082 |            | .997  |            | .745   |            | .428 |
|                                           | No            | 5.9        |      | 28.3       |       | 3.6        |        | 2.1        |      |
|                                           | Yes           | 2.7        |      | 28.3       |       | 3.1        |        | 3.4        |      |
| Condom use in last anal sex,<br>FSW       |               |            | .327 |            | .109  |            | .423   |            | .587 |
|                                           | No            | 1.3        |      | 20.2       |       | 1.8        |        | 4.0        |      |
|                                           | Yes           | 3.7        |      | 34.7       |       | 4.2        |        | 2.9        |      |
| CT                                        |               |            | .495 |            | .492  |            | .817   | n/a        | --   |
|                                           | Negative      | 5.7        |      | 28.3       |       | 3.6        |        |            |      |
|                                           | Positive      | 3.6        |      | 32.9       |       | 3.0        |        |            |      |
| NG                                        |               |            | .129 |            | .0001 |            | <.0001 | n/a        | --   |
|                                           | Negative      | 5.6        |      | 28.1       |       | 3.4        |        |            |      |
|                                           | Positive      | 7.9        |      | 73.2       |       | 34.6       |        |            |      |
| CT/NG                                     |               |            | .767 |            | .027  |            | .054   | n/a        | --   |
|                                           | Negative      | 5.7        |      | 28.0       |       | 3.4        |        |            |      |
|                                           | Positive      | 4.7        |      | 42.3       |       | 10.0       |        |            |      |

|                 |          |      |        |      |        |      |        |     |      |
|-----------------|----------|------|--------|------|--------|------|--------|-----|------|
| Active syphilis |          |      | <.0001 |      | <.0001 | n/a  | --     |     | .054 |
|                 | Negative | 5.2  |        | 26.9 |        |      |        | 2.2 |      |
|                 | Positive | 21.3 |        | 68.0 |        |      |        | 6.5 |      |
| HSV-2           |          |      | <.0001 | n/a  | --     |      | <.0001 |     | .027 |
|                 | Negative | 1.7  |        |      |        | 1.6  |        | 1.9 |      |
|                 | Positive | 16.2 |        |      |        | 8.6  |        | 3.5 |      |
| HIV             |          | n/a  | --     |      | <.0001 |      | <.0001 |     | .767 |
|                 | Negative |      |        | 25.2 |        | 3.0  |        | 2.2 |      |
|                 | Positive |      |        | 78.9 |        | 13.1 |        | 1.8 |      |

<sup>a</sup>MSM: Men who have sex with men; FSW: Female sex workers; CT: Chlamydia; NG: Gonorrhea; HIV: Human immunodeficiency virus; HSV-2: Herpes simplex virus, type 2
